## Facilitative priority effects drive parasite assembly under coinfection

Fletcher W. Halliday<sup>1\*</sup>, Rachel M. Penczykowski<sup>2\*</sup>, Benoit Barrès<sup>3,4</sup>, Jenalle L. Eck<sup>1</sup>, Elina Numminen<sup>3</sup>, Anna-Liisa Laine<sup>1,3</sup>

<sup>1</sup> Department of Evolutionary Biology and Environmental Studies, University of Zurich, 8057, Zurich, CH

<sup>2</sup> Department of Biology, Washington University in St. Louis, St. Louis, MO 63130 USA

<sup>3</sup> Organismal & Evolutionary Biology Research Program, PO Box 65, FI-00014 University of Helsinki, Finland

<sup>4</sup> Université de Lyon, Anses, INRAE, USC CASPER, Lyon, France

\*Co-first authors

Correspondence: Winterthurerstrasse 190 8057 Zurich, [fletcher.w.halliday@gmail.com](mailto:fletcher.w.halliday@gmail.com), +41 44 635 4767; One Brookings Drive, St. Louis, MO 63130 USA, [rpenczykowski@wustl.edu](mailto:rpenczykowski@wustl.edu), +1 314-935-8282

**Author contributions:** RMP and A-LL designed and implemented the experiments. BB conducted the wild host survey. JLE compiled the wild host survey data. EN resolved the parasite multi-locus genotypes. FWH analyzed the data and wrote the first draft. All authors contributed substantially to revising the manuscript.

1 **Abstract**

2 Host individuals are often coinfecting with diverse parasite assemblages, resulting in  
3 complex interactions among parasites within hosts. Within hosts, priority effects occur when the  
4 infection sequence alters the outcome of interactions among parasites. Yet, the role of host  
5 immunity in this process remains poorly understood. We hypothesized that the host response to  
6 first infection could generate priority effects among parasites, altering the assembly of later  
7 arriving strains during epidemics. We tested this by infecting sentinel host genotypes of *Plantago*  
8 *lanceolata* with strains of the fungal parasite, *Podosphaera plantaginis*, and measuring  
9 susceptibility to subsequent infection during experimental and natural epidemics. In these  
10 experiments, prior infection by one strain often increased susceptibility to other strains, and these  
11 facilitative priority effects altered the structure of parasite assemblages, but this effect depended  
12 on host genotype, host population, and parasite genotype. Thus, host genotype, spatial structure,  
13 and priority effects among strains all independently altered parasite assembly. Then, using a fine-  
14 scale survey and sampling of infections on wild hosts in several populations, we identified a  
15 signal of facilitative priority effects, which altered parasite assembly during natural epidemics.  
16 Together, these results provide evidence that within host priority effects by early arriving strains  
17 can drive parasite assembly, with implications for how strain diversity is spatially and temporally  
18 distributed during epidemics.

19

20 **Keywords:** disease ecology; priming; priority effects; biotic interactions; coinfection;  
21 competition; immunity

## 22 Introduction

23           The diversity of parasites – organisms that live in and on hosts, potentially causing  
24 disease – may rival the diversity of all other organisms on earth (Dobson *et al.* 2008). In light of  
25 this diversity, it is not surprising that host individuals are often infected with diverse parasite  
26 assemblages, composed of multiple parasite species or multiple genetic variants (‘strains’) of the  
27 same species (Mideo 2009; Greischar *et al.* 2020). Within hosts, interactions among coinfecting  
28 parasite strains can influence the dynamics of drug resistance (Wale *et al.* 2017), evolution of  
29 virulence (Bhattacharya *et al.* 2019), and the magnitude of parasite epidemics (Susi *et al.* 2015),  
30 with implications for host health (Read & Taylor 2001). Thus, understanding how parasite  
31 strains interact in shared host individuals may be important for predicting the spread of infectious  
32 diseases and ameliorating their impact on host populations. Yet, measuring how interactions  
33 among parasites influence natural epidemics is notoriously difficult, as this requires manipulating  
34 focal mechanisms of interactions and documenting the structure of parasite assemblages as  
35 epidemics unfold (Mideo 2009; Hawley & Altizer 2011; Hoverman *et al.* 2013; Zhan &  
36 McDonald 2013; Hellard *et al.* 2015; Tollenaere *et al.* 2015; Budischak *et al.* 2018). Using a  
37 parasitic fungus that infects a wild host plant, this study experimentally tests whether parasite  
38 interactions that are mediated by the host response to initial infection alter the structure of  
39 parasite assemblages within hosts under field conditions, and then leverages the results of these  
40 experiments to explain how parasite strains assemble during a natural epidemic.

41           Multiple parasites that encounter the same host individual can interact during  
42 simultaneous infections, known as coinfections (Griffiths *et al.* 2014; Tollenaere *et al.* 2015;  
43 Ezenwa 2016). One potential mechanism of interaction among coinfecting parasites occurs when  
44 host immune responses to one parasite alter host susceptibility to secondary infections of another

45 parasite (Lello *et al.* 2004; Mideo 2009; Chung *et al.* 2012; Halliday *et al.* 2018). This  
46 mechanism can result in either antagonism or facilitation among coinfecting parasites, and  
47 ultimately can alter parasite epidemics (Eswarappa *et al.* 2012; Tollenaere *et al.* 2015; Zélé *et al.*  
48 2018). The immune response to initial infection can suppress coinfection when infection by one  
49 parasite activates immune signaling pathways that induce resistance to subsequent infections, in  
50 a process known by a variety of terms including immune priming, cross protection, induced  
51 resistance, or cross-immunity (Jenner 1923; Fulton 1986; Van Loon 1997; Conrath *et al.* 2006;  
52 Pieterse *et al.* 2014). Alternatively, an early arriving parasite can facilitate coinfection by  
53 inactivating immune signaling pathways that protect hosts from multiple parasites (Spoel *et al.*  
54 2007; Kliebenstein & Rowe 2008). These effects can be temporary and spatially restricted within  
55 hosts (Koornneef *et al.* 2008), or systemic and persistent long after initial infection (Pieterse *et*  
56 *al.* 2014). Both mechanisms of immune-mediated interactions among parasites have been  
57 reported in plant and animal hosts (Glazebrook 2005; Ezenwa *et al.* 2010; Pieterse *et al.* 2014).  
58 These effects, which have been predominantly tested in laboratory environments (but see  
59 Halliday *et al.* 2018), indicate that the sequence and timing of infections may influence the  
60 structure of parasite assemblages.

61         The field of community ecology provides a framework for understanding how the  
62 sequence of infection on host individuals might alter parasite assemblages as epidemics unfold  
63 (Hoverman *et al.* 2013; Vannette & Fukami 2014; Fukami 2015; Johnson *et al.* 2015; Halliday *et*  
64 *al.* 2017; Clay *et al.* 2019; Karvonen *et al.* 2019). Specifically, interactions among parasites that  
65 are contingent on the sequence of past events can be a consequence of priority effects within  
66 hosts. Within hosts, priority effects occur when the per-capita strength of antagonism or  
67 facilitation among parasites is altered by their sequence of arrival (Hoverman *et al.* 2013;

68 Mordecai *et al.* 2016). Priority effects, in turn can drive community assembly, thereby altering  
69 the structure of parasite communities during natural epidemics (Halliday *et al.* 2017; Clay *et al.*  
70 2020). Priority effects are expected to occur most commonly when species exhibit high niche  
71 overlap and when early arriving species have large impacts on the availability of that niche  
72 (Vannette & Fukami 2014). A host comprises the entire niche available to parasites during  
73 infection (Kuris *et al.* 1980; Rynkiewicz *et al.* 2015), and thus coinfecting parasites often exhibit  
74 high niche overlap (Sousa 1992; Graham 2008; Seabloom *et al.* 2015), particularly when parasite  
75 assemblages are comprised of coinfecting strains of the same parasite species (e.g., Wale *et al.*  
76 2017). Although priority effects have been predominantly used to describe community assembly  
77 in multi-species parasite assemblages (reviewed in Clay *et al.* 2019), these same principles may  
78 apply to parasite assemblages comprised of multiple strains (Greischar *et al.* 2020). By activating  
79 immune responses that alter host susceptibility, early arriving strains can therefore determine the  
80 availability of the shared host niche (Cobey & Lipsitch 2013); thus, the immune response to  
81 initial infection may drive priority effects among parasite strains within hosts, thereby altering  
82 the structure of parasite assemblages within hosts.

83         The degree to which the sequence and timing of infection influences parasite assemblages  
84 might depend on the history of interactions between host and parasite populations (Tollenaere *et*  
85 *al.* 2015). This history of interactions between host and parasite populations, which is typically  
86 measured through local adaptation assays (Greischar & Koskella 2007; Hoeksema & Forde  
87 2008), is commonly reflected by differences in the susceptibility of certain host genotypes to  
88 certain parasite genotypes (Burdon & Laine 2019). Interactions among sequentially arriving  
89 parasites could also depend on host or parasite genotypes if a given host genotype is more or less  
90 sensitive to infection by the first or second arriving parasite genotype (Lambrechts *et al.* 2006),

91 or if the response triggered by the first arriving parasite is genotype specific (Ferro *et al.* 2019;  
92 Westman *et al.* 2019). Thus, whether or not within-host priority effects alter parasite epidemics  
93 might depend on complex interactions among host and parasite genotypes. Consequently, it is  
94 essential to incorporate genotypic variation into studies of sequential infection among parasite  
95 strains.

96 The host response to infection may alter parasite interactions and epidemics (Lello *et al.*  
97 2004; Graham 2008; Tollenaere *et al.* 2015), but we lack studies that experimentally manipulate  
98 prior parasite exposure and measure the consequences for parasites outside of the lab (Hellard *et*  
99 *al.* 2015; Pedersen & Fenton 2015; Budischak *et al.* 2018), hampering our understanding of the  
100 general processes through which within-host parasite interactions alter parasite assemblages in  
101 nature. This study addresses this research gap experimentally by first infecting host plants with  
102 parasitic fungi, physically restricting those parasites from interacting directly within hosts, and  
103 then testing whether the host response to initial infection alters the structure of parasite  
104 assemblages. We then leverage the experimental results to explain how parasite strains assemble  
105 within hosts during a natural epidemic. We find that parasites exhibit facilitative priority effects  
106 driven by the host response to initial infection, and that these facilitative priority effects can alter  
107 the structure of parasite assemblages during a natural epidemic. These results indicate that the  
108 sequence of infection can determine the probability of coinfection, altering the trajectory of  
109 parasite assembly, and leading to pronounced differences in the structure of parasite assemblages  
110 among hosts.

111

112 **Results & Discussion**

113            In order to examine the role of priority effects among parasites that are mediated by the  
114 host (i.e., plant) in response to prior infection and the influence of priority effects on the structure  
115 of parasite assemblages, we carried out two experiments, referred to as the “manipulated  
116 epidemic experiment” and the “natural epidemic experiment”, and a fine-scale survey and  
117 sampling of infections in the wild, referred to as the “wild host survey”, using the focal host  
118 *Plantago lanceolata*, and the obligate parasite *Podosphaera plantaginis* (Fig 1).

**A) Manipulated epidemic experiment:**  
*Can the host response to prior infection drive parasite assembly via priority effects?*

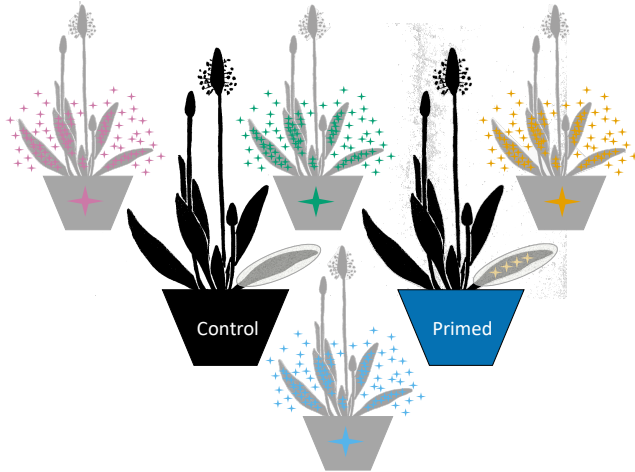

**B) Natural epidemic experiment:**  
*Can host-mediated priority effects influence parasite assembly during a natural epidemic?*

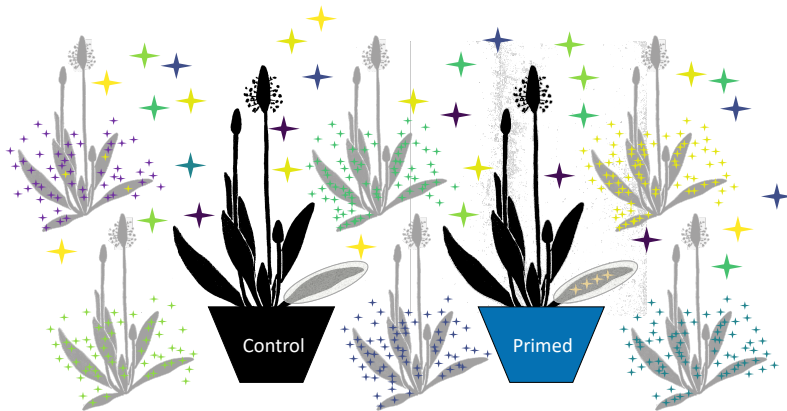

**C) Wild host survey:**  
*Can host-mediated facilitative priority effects be detected in natural populations?*

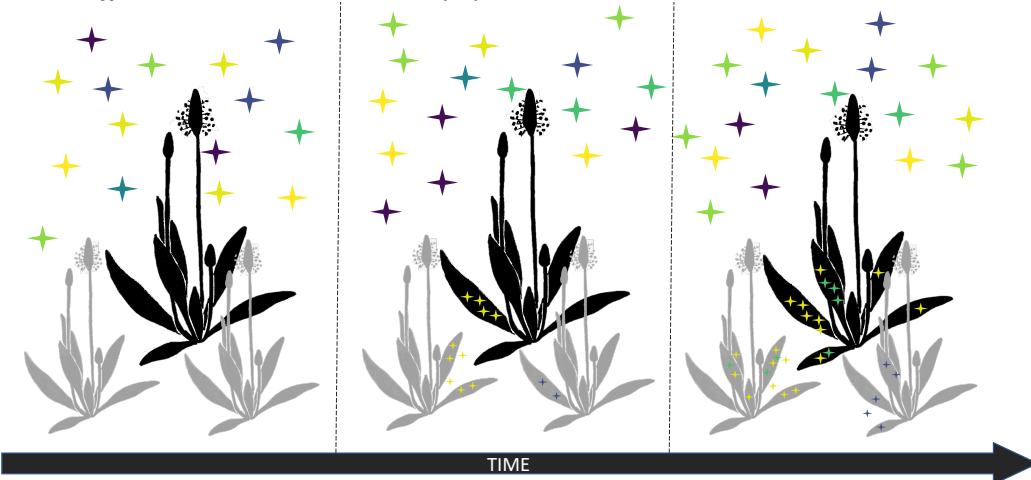



120

121 **Figure 1.** Illustration of key differences and similarities among the three field studies presented in this  
122 manuscript. Pot color represents different priming treatments (black = control; blue = primed). Star color  
123 represents different parasite genotypes (i.e., strains). A) To test whether host (i.e., plant) responses to  
124 prior infection can drive parasite assembly via priority effects, focal potted hosts (black) were either  
125 inoculated or mock-inoculated with one of four priming strains. Then hosts were exposed to all four  
126 priming strains by placing heavily infected potted hosts (grey) adjacent to the focal hosts under field  
127 conditions. This experiment included four different host genotypes not depicted in this figure. B) To test  
128 whether host-mediated priority effects among parasites can influence parasite assembly during a natural  
129 epidemic, focal potted hosts (black) were either inoculated or mock inoculated with a priming strain  
130 associated with a given host population and then embedded in a wild host population (grey) during a  
131 natural epidemic. This experiment included four different host genotypes, two infection timing  
132 treatments, and three host populations that are not depicted in this figure. C) To test whether a signal of  
133 host-mediated facilitative priority effects among parasites could be detected in natural populations, focal  
134 wild hosts (black) occurring in wild host populations (grey) were repeatedly surveyed over time. This  
135 experiment included 13 host populations that are not depicted in this figure.

136

137

138

139

140 *Can host responses to prior infection drive parasite assembly via priority effects?*

141           We carried out the manipulated epidemic experiment in a common garden at the Lammi  
142 Biological Station to test whether parasite strains exhibit priority effects that are mediated by the  
143 host response to initial infection (Fig. 1). Both the host and parasite species naturally occur in  
144 this location. In the manipulated epidemic experiment, four host genotypes were either  
145 inoculated or mock-inoculated with one of four parasite strains, which were sealed inside mesh  
146 pollination bags to prevent direct strain interactions, and then exposed to all four priming strains  
147 for four days. To be consistent with previously published literature (Laine 2011; Conrath *et al.*  
148 2015; Douma *et al.* 2017; Mauch-Mani *et al.* 2017), we refer to the experimental treatment as the  
149 “priming treatment” and the experimentally inoculated strains as “priming strains” (Fig. 1).

150           One challenge of predicting how within-host interactions will alter infection outcomes  
151 during epidemics is the difficulty of isolating host-mediated interactions from other interactions  
152 among parasites, such as resource or interference competition (Mideo 2009; Budischak *et al.*  
153 2015, 2018). We overcame this limitation experimentally by leveraging the modular growth form  
154 of plant hosts. Specifically, for foliar parasites in plant hosts, resource and interference  
155 competition are expected to be strongest within individual host leaves (Tollenaere *et al.* 2015;  
156 Borer *et al.* 2016; Halliday *et al.* 2017). Because powdery mildews only feed within individual  
157 host leaves (Bushnell 2002) and the priming strain was restricted from spreading beyond the  
158 inoculated host leaf onto the rest of the host plant, any response to experimental inoculation can  
159 be interpreted as an effect that is mediated by the host response to initial infection. Thus, the  
160 inoculation treatment was intended to test whether initial infection by one parasite could “prime”  
161 the host to respond differently upon subsequent exposure, generating priority effects mediated by  
162 the host.

163 We tested whether the priming treatment altered the probability of a host becoming  
164 infected in the manipulated epidemic using a logistic mixed model. As predicted, hosts that were  
165 experimentally inoculated were more likely to become subsequently infected during the  
166 experimental epidemic ( $p = 0.0088$ ; Fig. 2a; Table S1a). This effect was qualitatively similar  
167 using the (logit-transformed) proportion of leaves infected as a response measure representing  
168 infection severity ( $p = 0.019$ ; Table S1b). Although host susceptibility to infection and the  
169 severity of infection were positively influenced by the priming treatment, this effect disappeared  
170 when we evaluated infection severity among infected hosts only ( $p = 0.82$ ; Table S1c),  
171 suggesting that priority effects may act qualitatively (e.g., by altering susceptibility to infection)  
172 rather than quantitatively (e.g., by altering infection severity). This result is consistent with  
173 ecological theory, which suggests that priority effects should primarily function to prevent or  
174 facilitate establishment or persistence rather than population growth, *per se* (Fukami *et al.* 2016).  
175 This result therefore suggests that increased susceptibility to infection following early exposure  
176 to a pathogen strain can influence subsequent infection outcomes in the field.

177 We next tested whether the facilitative effect of early exposure on susceptibility to  
178 infection during the experimental epidemic differed among host genotypes and priming strains.  
179 Consistent with theory grounded in the history of interactions between host and parasite  
180 populations (e.g., Tollenaere *et al.* 2015), the facilitative effect of early infection depended on  
181 the priming strain ( $p = 0.050$ ) and host plant genotype ( $p = 0.024$ ), though there was no  
182 interaction between host plant genotype and the priming treatment ( $p = 0.86$ ; Table S2a, Fig. 2c).  
183 We therefore dropped the non-significant interaction, resulting in a reduced model, and estimated  
184 the coefficients from the reduced model. Consistent with facilitative priority effects, the priming  
185 strains G46 and O49 significantly increased the probability of infection under field conditions ( $p$

186 = 0.039 and  $p = 0.016$ , respectively), while strain O10 marginally significantly increased the  
187 probability of infection ( $p = 0.051$ ) and strain O15 did not ( $p = 0.62$ ). This result suggests that  
188 only some early arrivers strongly influenced the availability of the niche for later arrivers,  
189 providing a possible mechanism for facilitative priority effects within hosts (e.g., Vannette &  
190 Fukami 2014). These results were qualitatively similar using the proportion of leaves infected as  
191 a metric of infection severity (Table S2b). Although the effect of the priming treatment on host  
192 susceptibility to infection and the severity of infection were influenced by host and parasite  
193 genotype, this effect disappeared when we evaluated infection severity among infected hosts  
194 only (Priming strain  $p = 0.95$ ; Host plant genotype  $p = 0.61$ ; Table S2c), lending further support  
195 to the idea that priority effects act qualitatively rather than quantitatively in this system.

196         Together, these results suggest that the host response to initial infection depended on  
197 which parasite strain arrived first. However, for priority effects to alter the structure of parasite  
198 assemblages, later arriving strains must also be sensitive to the plant response to initial infection  
199 (Vannette & Fukami 2014). To explore this mechanism of within-host interactions, we next  
200 genotyped infections on each individual host following exposure to all four strains under natural  
201 conditions and then tested for interactions among the priming treatment, plant genotype, and  
202 whether or not the later arriving strain was the same as the early arriving strain. For priority  
203 effects to occur, facilitative effects should occur among different strains. In other words, a  
204 priority effect could only occur if the early arriving strain facilitated other later arriving strains.  
205 Across both treatments, infection by a non-priming strain was about 1.4 times more likely than  
206 infection by the priming strain ( $p < 0.001$ ; Fig 2b). Consistent with the hypothesis that parasite  
207 strains can exhibit within-host priority effects, the effect of early infection on the probability of  
208 subsequent infection was qualitatively similar between secondary infections caused by the

209 priming strain ( $p = 0.004$ ) and secondary infections caused by a different strain from the priming  
210 strain ( $p = 0.033$ ). In other words, there was a significant main effect of the priming treatment ( $p$   
211  $= 0.003$ ), but no interaction between the priming treatment and whether or not the host became  
212 infected with a strain other than the priming strain ( $p = 0.24$ ; Table S3).

213         Finally, we tested whether within-host priority effects altered the structure of parasite  
214 assemblages using a multivariate generalized linear model (Wang *et al.* 2012; Warton *et al.*  
215 2012). As expected, different parasite assemblages formed on hosts that received different  
216 priming treatments (LRT = 37;  $p = 0.040$ ; Table S4; Fig. 2d), though there were no significant  
217 differences among different host genotypes (LRT = 34.94;  $p = 0.085$ ), and the effect of priming  
218 treatments on the structure of parasite assemblages did not interact with host genotype (LRT =  
219 57;  $p = 0.077$ ). Thus, priority effects among strains altered parasite assembly, and the trajectory  
220 of assembly depended on the identity of the early arriving strain, but not the genotype of the  
221 host.

222

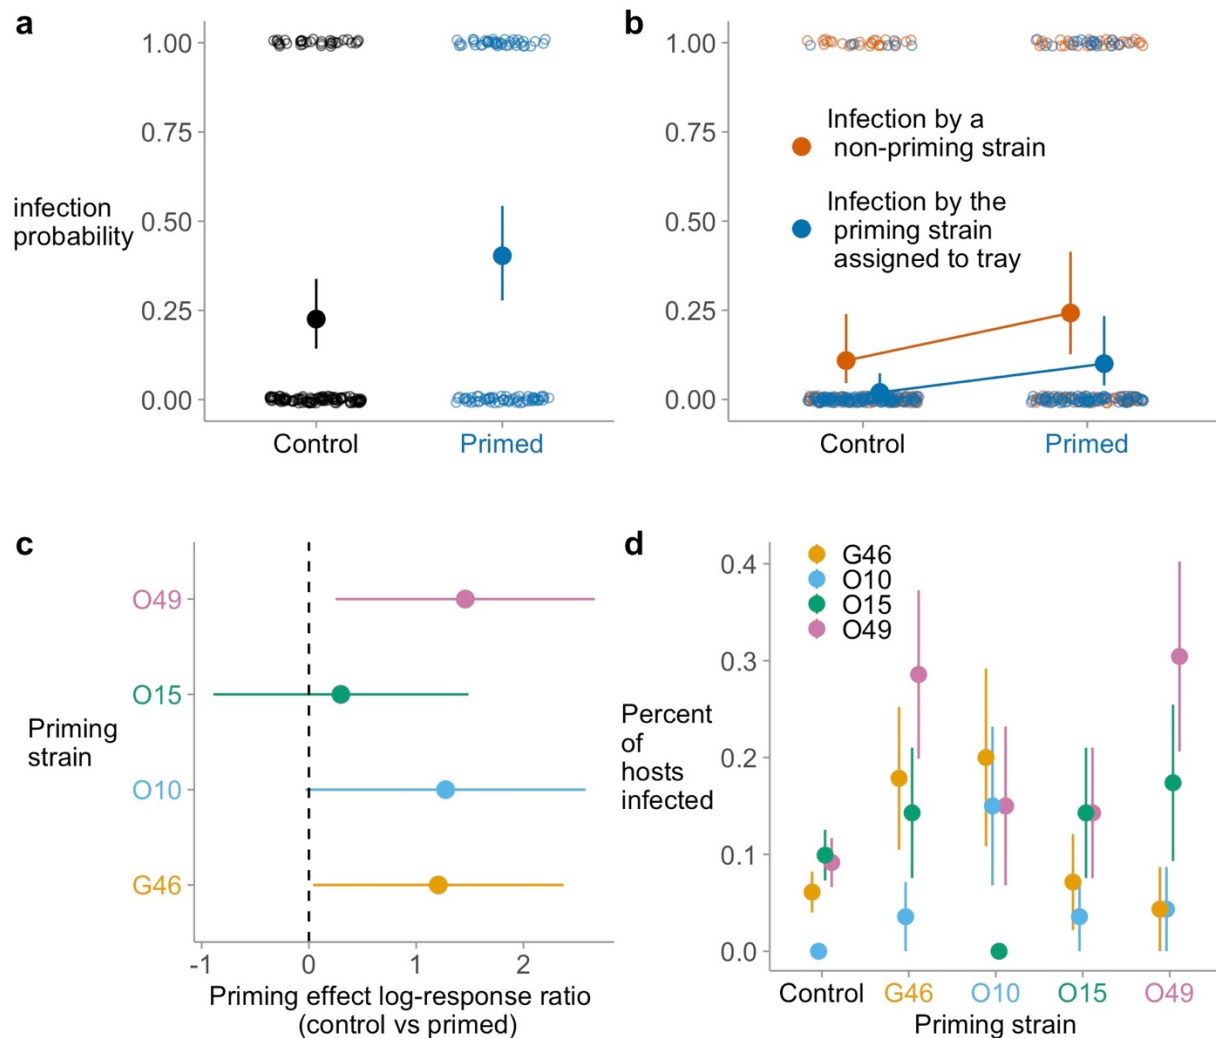

224

225 **Figure 2.** Results from the manipulated epidemic experiment. The effect of the priming  
 226 treatment on a) whether or not a host became infected with any strain; b) whether or not a host  
 227 became infected with the priming strain assigned to the experimental block (control hosts were  
 228 mock-inoculated with the priming strain associated with that block), or any non-priming strain;  
 229 c) whether or not a host became infected with any strain as a function of the priming strain,  
 230 shown as a log-response ratio; d) the proportion of hosts infected by each strain during the  
 231 manipulated epidemic experiment. In panels a-c, filled points are model-estimated means, error  
 232 bars are model-estimated 95% confidence intervals, and open points show the raw data. In panel  
 233 d, points show the proportion of hosts infected and the error bars show one standard error around  
 234 those points. These results highlight the differential effect of each strain on the priming response  
 235 of the plant as well as the differential sensitivity of each strain to that priming effect. Only strain  
 236 O15 was a uniformly poor primer of subsequent infection. All other parasite strains significantly  
 237 facilitated subsequent infection by at least one other strain. Together, these results suggest that  
 238 by differentially determining the plant response to infection and experiencing differential  
 239 sensitivity to that response, prior infection can strongly alter assembly of these pathogen strains.

240

241 *Can host-mediated priority effects among parasites influence parasite assembly during a natural*  
242 *epidemic?*

243         The manipulated epidemic experiment tested whether hosts could mediate priority effects  
244 among parasites, and whether such priority effects could influence parasite assembly during an  
245 experimental epidemic. We next carried out the natural epidemic experiment (Fig 1) to test  
246 whether host-mediated priority effects could be generalized to predict the outcome of natural  
247 epidemics by embedding sentinel hosts that were either primed or mock-inoculated into an  
248 ongoing epidemic in three wild host populations in the Åland archipelago. In addition to  
249 manipulating infection sequence (primed vs mock-inoculated), this experiment also manipulated  
250 the timing of prior infection by priming hosts either four or eight days prior to exposing hosts to  
251 the natural epidemic.

252         We first tested whether the host response to prior infection could generate priority effects  
253 using a logistic mixed model. Consistent with expectations from the manipulated epidemic  
254 experiment, the priming treatment significantly influenced the probability of a host becoming  
255 infected during the natural epidemic experiment ( $p < 0.001$ ; Table S5). However, in contrast with  
256 the manipulated epidemic experiment, there was no significant effect of host genotype ( $p =$   
257  $0.34$ ). Consistent with expectations grounded in previous studies of this system (Penczykowski *et*  
258 *al.* 2018), the probability of infection differed among populations ( $p = 0.002$ ). But, in contrast  
259 with expectations grounded in laboratory studies of plant immunity (Pieterse *et al.* 2012) and  
260 ecological theory (Fukami 2015), there was no difference in the magnitude of the priming effects  
261 between hosts that were primed eight days prior to experimental placement in the field and hosts  
262 that were primed four days prior to placement in the field (Fig 3a). The results were qualitatively

263 similar using the (logit-transformed) proportion of leaves infected as a response variable  
264 representing infection severity. However, there was also a significant three-way interaction in the  
265 model of infection severity, suggesting that priority effects occurred, that these priority effects  
266 depended on infection sequence and timing, but only in certain populations, and only among  
267 certain host genotypes (Fig S1a). The reduced model of infection severity among infected hosts  
268 also included significant two-way interactions between population and host genotype ( $p =$   
269  $0.033$ ), and between host genotype and experimental treatment ( $p = 0.019$ ; Fig S1b).

270 Our result that host-mediated interactions among parasites almost universally favored  
271 coinfection is in contrast to prior studies suggesting that priming can commonly reduce the  
272 probability of coinfection through cross resistance (Fulton 1986; Pieterse *et al.* 2014; Biere &  
273 Goverse 2016), potentially raising concerns that these results might be system specific; however,  
274 a prior study in this wild plant pathosystem suggests a different explanation for these contrasting  
275 results. Specifically, using different *Plantago lanceolata* hosts and *Podosphaera plantaginis*  
276 genotypes, Laine (2011) found that priming reduced spore production in the lab, but increased  
277 infection severity in the field. Thus, we suggest that the difference between the results presented  
278 here and commonly reported results of cross resistance in other systems might be attributable to  
279 laboratory versus field environments, adding to a growing body of evidence that within-host  
280 interactions studied in the laboratory might be poor predictors of infection outcomes during  
281 natural epidemics (Seabloom *et al.* 2009; Leung *et al.* 2018; Clay *et al.* 2019).

282 Finally, we tested whether priority effects among parasite strains could lead to variation  
283 in the structure of parasite assemblages among hosts during a natural epidemic using a  
284 multivariate generalised linear model. This model did not include any significant interactions.  
285 However, as expected, there were different parasite assemblages on hosts that received different



286 priming treatments (LRT = 111;  $p < 0.001$ ), among different populations (LRT = 90;  $p < 0.001$ ),  
287 and among different host genotypes (LRT = 44;  $p = 0.048$ ; Table S6; Fig 3b). Thus, host  
288 genotype, spatial structure, and priority effects among strains all independently altered parasite  
289 assembly in the natural epidemic experiment.

290

291

292

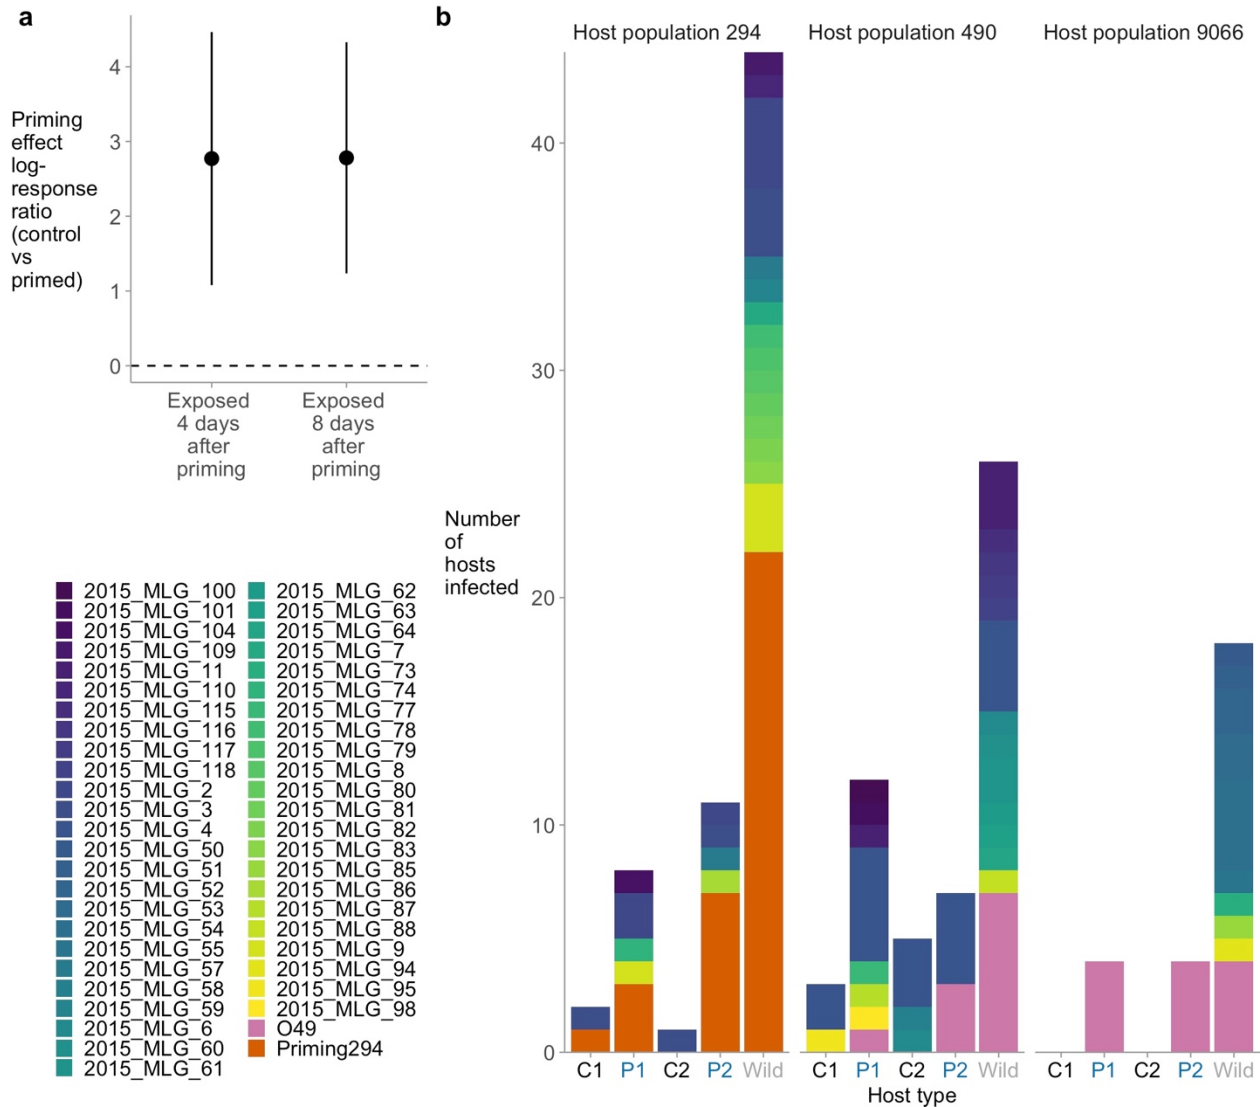

293

294 **Figure 3.** Results from the natural epidemic experiment. The effect of the sequence and timing  
 295 of infection on a) whether or not a host became infected with any strain, shown as a log-response  
 296 ratio between each control and each priming treatment. (e.g., C1 vs P1 and C2 vs P2); and b) the  
 297 number of hosts infected by each strain grouped by whether a host was experimental (C1, C2,  
 298 P2, P2) or wild (shown in grey). Plants were primed either 8 days (treatment P1) or 4 days  
 299 (treatment P2) prior to being placed into the field. There were also C1 and C2 control plants set  
 300 up at the same time (but mock inoculated). Points are model-estimated means, and error bars are  
 301 model-estimated 95% confidence intervals. Colors represent different strains, with pink and  
 302 orange corresponding to the two priming strains used in this experiment (O49 and Priming294,  
 303 respectively). These results show that, consistent with the manipulated epidemic experiment,  
 304 experimental priming increased the probability of a host becoming infected. However, that effect  
 305 did not depend on infection timing (P1 vs P2). As a consequence of this effect, experimentally  
 306 primed hosts had more complex parasite communities that were more similar to wild hosts than  
 307 mock-inoculated control hosts.  
 308

309

310 *Can a signal of host-mediated facilitative priority effects among parasites be detected in natural*  
311 *populations?*

312 Our experimental results showed consistent host-mediated facilitative priority effects  
313 among parasite strains. However, in addition to host-mediated interactions, parasites can also  
314 interact via resource or interference competition during natural epidemics (Mideo 2009). In  
315 theory, the host-mediated interactions can be either antagonistic or facilitative, whereas resource  
316 and interference competition are generally expected to reduce the risk of coinfection (Mideo *et*  
317 *al.* 2008; Pedersen & Greives 2008; Halliday *et al.* 2018). Thus, although both experiments  
318 suggested that the host response to prior infection can facilitate subsequent infection via within-  
319 host priority effects, the degree to which this process plays out to influence parasite assemblages  
320 during natural epidemics remains unclear.

321 We tested whether host-mediated priority effects are sufficiently important to influence  
322 the structure parasite assemblages in nature by analyzing the results of a longitudinal survey of  
323 wild host individuals during a natural epidemic (i.e., the wild host survey; Fig 1). The wild host  
324 survey was carried out in the Åland archipelago, and included 105 host individuals from 13  
325 populations, sampled biweekly for infection starting on 7 July, 2014. Once a host became  
326 infected, it entered the dataset as a focal host. To determine infection sequence among hosts, we  
327 sampled lesions and genotyped infections twice on each focal host: first when more than one leaf  
328 on a focal host was infected, and then again at the end of the season. These two genotyping  
329 sessions provide data on the sequence and timing of infection among hosts, while biweekly  
330 surveys of whole host populations provide information on parasite phenology.

331           We hypothesized that if the host response to prior infection was sufficiently strong to  
332 alter parasite community assembly, then we would observe a signal of facilitation among co-  
333 occurring parasite strains during a natural epidemic. To test whether parasite strains exhibit  
334 priority effects within hosts, we first fit a series of cox proportional hazards models following  
335 Halliday et al (2017, 2018). These models test whether the time until infection by each parasite  
336 strain was influenced by whether or not a host had been previously infected by another strain. In  
337 total this analysis tested for 286 potential pairwise interactions among parasite strains. However,  
338 despite the large number of potentially interacting parasite strains, only three pairwise  
339 interactions resulted in a significant priority effect as defined by Halliday et al (2017, 2018).  
340 Specifically, 2014\_MLG\_78 and 2014\_MLG\_10 were significantly facilitated by prior infection  
341 by 2014\_MLG\_5 and 2014\_MLG\_42 respectively ( $p = 0.009$ ;  $p = 0.035$ ), while 2014\_MLG\_3  
342 was antagonized by prior infection by 2014\_MLG\_43 ( $p=0.009$ ); importantly, given the  
343 numerous comparisons per host individual, even these significant effects should be interpreted  
344 with caution. These results therefore suggest that, on average, parasite strains were not exhibiting  
345 measurable priority effects within hosts.

346           There are many potential reasons for the absence of significant interactions among  
347 parasites, including the physiological state of wild host plants (Penczykowski *et al.* 2018), the  
348 presence of counterbalancing direct interactions among parasites (Mideo *et al.* 2008), skewed  
349 distribution of infections by the different strains in the field (Laine 2007), or the relatively  
350 infrequent sampling of host individuals in the field. However, although within-host priority  
351 effects were rarely significantly positive or negative, we still wanted to know whether a signal of  
352 facilitation could be observed among potentially interacting parasite strains. Overall, early  
353 infection tended to facilitate subsequent infection by other strains more commonly than

354 preventing subsequent infection by other strains ( $p < 0.001$ ; Fig 4a), consistent with priority  
355 effects being mediated by the host response to prior infection. These results support the  
356 hypothesis that facilitative interactions among parasite strains, mediated by the host response to  
357 prior infection, would result in a signal of facilitation among co-occurring parasite strains.

358         Finally, to test whether parasite phenology among strains altered parasite assembly within  
359 hosts, we fit a multivariate generalised linear model. We hypothesized, in accordance with  
360 ecological theory (e.g., Vannette & Fukami 2014) and our experimental results, that strains that  
361 emerged later in the growing season (i.e., strains with later phenology) would be more sensitive  
362 to facilitative priority effects, and that strains that emerged earlier in the growing season (i.e.,  
363 strains with early phenology) would more strongly influence parasite assembly. Consistent with  
364 this hypothesis, the structure of parasite assemblages differed significantly among hosts with  
365 differing phenology of the early-arriving strains (LRT = 15.23;  $p = 0.002$ ; Fig 4b; Table S7),  
366 even after accounting for survey date (LRT = 238;  $p = 0.001$ ), and host different population  
367 (LRT = 189;  $p = 0.001$ ).

368

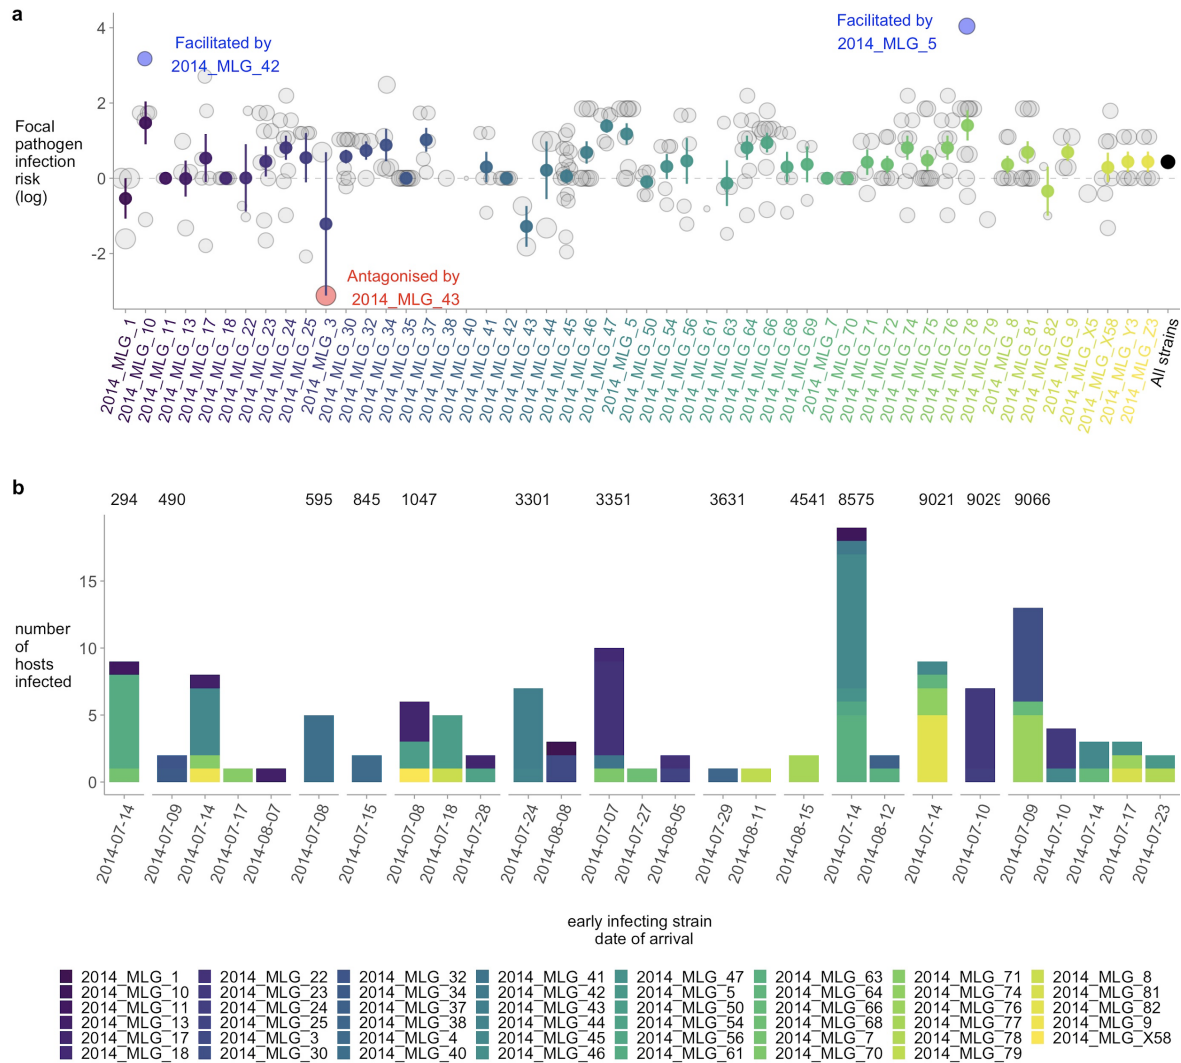

369

370 **Figure 4.** Results from the wild host survey. a) The effect of infection sequence on the risk of a  
 371 host becoming infected with each parasite strain. The x-axis shows the focal (i.e., late arriving)  
 372 parasite strains from field-collected samples. The grey, blue, and red points are coefficient  
 373 estimates from cox proportional hazards models measuring the pairwise interaction between each  
 374 focal strain and each co-occurring other (i.e., early arriving) strain; point size represents the  
 375 average number of surveys per host individual; blue and red indicate significant facilitation and  
 376 antagonism ( $p < 0.05$ ), respectively, and grey indicates insufficient evidence for significant  
 377 priority effect ( $p > 0.05$ ). The colored points with error bars show the mean and one standard  
 378 error across all coefficients for each focal parasite strain. The black point is the model estimated  
 379 mean across all parasite strains, and the black error bar (which is small and largely obscured by  
 380 the black circle) is the 95% confidence interval from an intercept-only model, indicating that on  
 381 average, interactions tended to be positive. b) The number of hosts infected by each strain at the  
 382 end of the growing season grouped by the date that the early arriving strain was first observed  
 383 in the field. Panels represent different host populations. These results show that, across all parasite  
 384 strains, interactions were most commonly facilitative, and hosts that were first infected by strains  
 385 with early phenology were more likely to become infected by more complex communities at the  
 386 conclusion of the growing season.

387

## 388 **Conclusions**

389         The sequence and timing of infection can strongly influence parasite interactions and  
390 epidemics (Halliday *et al.* 2017, 2018; Clay *et al.* 2019, 2020), yet the degree to which this  
391 process is driven by the host response to infection versus other mechanisms of interaction among  
392 parasites remains poorly understood. This study leveraged a model wild-plant pathosystem to fill  
393 this gap (Penczykowski *et al.* 2016). Specifically, our study revealed three key findings: (1) by  
394 manipulating infection sequence during an experimental epidemic, we showed that host-  
395 mediated interactions among parasites almost universally favored coinfection; (2) by  
396 manipulating infection sequence during a natural epidemic, we showed that this process could  
397 alter how parasite strains assemble; and (3) by tracking wild host individuals during the course of  
398 a different natural epidemic, we identified a signal of host-mediated facilitation among parasite  
399 strains that could be linked to the structure of parasite assemblages. Our results therefore provide  
400 comprehensive evidence that parasite interactions, mediated by the host response to initial  
401 infection, can facilitate subsequent infection by different parasite strains, altering the trajectory  
402 of parasite assembly during natural epidemics.

403         In addition to isolating host-mediated interactions from other interactions among  
404 parasites, our experimental approach overcomes an additional key limitation of past  
405 observational studies: the need to rely on counterfactual reasoning. Linking infection sequence  
406 and within-host priority effects during natural epidemics is notoriously challenging (Budischak  
407 *et al.* 2018; Rynkiewicz *et al.* 2019). Our experimental data showed clear evidence of host-  
408 mediated facilitation among parasites. Pairing this experimental approach with a fine-scale  
409 survey and sampling of infections in the wild during a natural epidemic thus allowed us to

410 interpret a signal of host-mediated facilitation that would be uninterpretable from observational  
411 data alone. Our results suggest that, by differentially determining the plant response to infection  
412 and experiencing differential sensitivity to that response, prior infection can strongly alter the  
413 structure of parasite assemblages during epidemics.

414         Priority effects among strains favored coinfection and altered parasite assembly, and the  
415 trajectory of assembly depended on the genotype of the early arriving strain. This result supports  
416 the idea that species interactions – in this case host-parasite and parasite-parasite interactions –  
417 can depend on intraspecific variation in characteristics of organisms (Bolnick et al. 2011;  
418 Laughlin et al. 2012; Siefert 2012). Intraspecific diversity is ubiquitous in host and parasite  
419 populations, and has prompted considerable research into local adaptation among hosts and  
420 parasites (Greischar & Koskella 2007), parasite aggregation (Shaw & Dobson 1995), and disease  
421 emergence (Lloyd-Smith et al. 2005). Yet, how this diversity impacts parasite assembly is not  
422 known. Importantly, our results suggest that by influencing host susceptibility, intraspecific  
423 variation can determine how strain diversity is spatially and temporally distributed during  
424 epidemics.

425         In our experimental manipulation of a natural epidemic, we found evidence that infection  
426 sequence, but not infection timing altered future host susceptibility. We also found strong  
427 evidence that host genotype and spatial structure altered the structure of parasite assemblages  
428 within hosts, but these effects did not alter the direction or magnitude of priority effects. Thus,  
429 we conclude that differences among host genotypes and among populations may play a large role  
430 in the assembly of parasite strains in natural populations, but these effects are independent of the  
431 robust effect of facilitation by sequentially arriving parasite strains in this system.

432



433 **Methods**

434 *Study system*

435         The host plant, *Plantago lanceolata* L. (ribwort plantain), is a perennial rosette-forming  
436 herb that reproduces either sexually, as an obligate outcrosser with wind-dispersed pollen, or via  
437 vegetative propagation of side-rosettes (Sagar & Harper 1964; Ross 1973). This species has a  
438 cosmopolitan distribution, and grows in fragmented populations on dry meadows and pastures in  
439 the Åland archipelago (SW Finland) (Ojanen *et al.* 2013). *Plantago lanceolata* is host to the  
440 obligate parasite *Podosphaera plantaginis* (Castagne; U. Braun and S. Takamatsu), a powdery  
441 mildew fungus in the order Erysiphales within the Ascomycota. The fungus grows on the leaf  
442 surface and extracts plant nutrients via haustoria that enter the epidermis (Bushnell 2002). On the  
443 leaf surface, mycelia produce chains of asexual, wind-dispersed transmission spores (conidia).  
444 The parasite reproduces clonally throughout the summer growing season, and then produces  
445 resting structures (chasmothecia) via haploid selfing or outcrossing (Tollenaere & Laine 2013)  
446 which enable the parasite to survive when the host plant has died back to rootstock in winter.  
447 Within the chasmothecia, haploid ascospores develop, which re-initiate epidemics in spring  
448 (Tack & Laine 2014).

449         The metapopulation dynamics of this host-parasite interaction in ca. 4000 populations in  
450 Åland have been studied since the year 2001 (Laine & Hanski 2006; Jousimo *et al.* 2014).  
451 Powdery mildew infection combined with stressful environmental conditions can cause high  
452 mortality of *Pl. lanceolata* (Laine 2004), and infection reduces host population growth rates  
453 (Laine 2004; Penczykowski *et al.* 2015).

454         Successful infection is the outcome of a high degree of specificity where a given *Pl.*  
455 *lanceolata* genotype can be susceptible to some *Po. plantaginis* strains while able to block

456 infection by others (Laine 2004, 2007). Hosts that are qualitatively susceptible to a given parasite  
457 strain may still vary in their ability to mitigate its sporulation once infected (i.e., quantitative  
458 resistance). Evidence for diversity within and among host populations comes from laboratory  
459 inoculation experiments showing variation in resistance to a given set of parasite strains among  
460 clonal plant lines under controlled conditions (Laine 2004, 2007). The *Po. plantaginis*  
461 populations in Åland are also diverse, comprised of genetically and phenotypically distinct  
462 parasite strains (Tollenaere *et al.* 2012), with a high proportion of coinfection by different  
463 multilocus genotypes (MLGs) (Susi *et al.* 2015).

464

#### 465 *Study design*

466         The study consisted of two experiments and a fine-scale survey and sampling of  
467 infections in the wild (Fig. 1). In the first experiment, which we refer to as the “manipulated  
468 epidemic experiment”, we tested whether parasite strains exhibit priority effects that are  
469 mediated by the host plant response to prior infection. We addressed this question by first  
470 inoculating or mock-inoculating hosts of four different genotypes with one of four parasite  
471 strains and then later exposing the same hosts to all four strains in a common garden  
472 environment. In the second experiment, which we refer to as the “natural epidemic experiment”,  
473 we tested whether host-plant mediated priority effects among parasite strains can influence  
474 parasite assembly during a natural epidemic. We addressed this question by first inoculating or  
475 mock-inoculating hosts with one of three different parasite strains, then embedding those hosts  
476 into one of three wild host populations in order to expose the hosts to a natural epidemic, and  
477 then compared the effect of these treatments on the structure of the resulting parasite assemblage  
478 on each sentinel host plant as well as wild plants from the same populations. These experiments

479 revealed strong facilitative priority effects among parasite strains, and indicated that these  
480 facilitative priority effects can alter parasite assembly during natural epidemics. Finally, we  
481 analyzed the results of an observational study, which we refer to as the “wild host survey,” to test  
482 whether a signal of host-plant mediated facilitative priority effects is detectable among parasite  
483 strains in natural populations. We addressed this question by tracking infections on wild host  
484 plants over the course of a natural epidemic.

485

486 Experimental plant genotypes. To test whether the outcome of sequential infections  
487 varied across different host plant genetic backgrounds, we used a set of four host plant maternal  
488 lines in both experiments (Table S8). Each maternal line came from a single seed head from a  
489 different mother plant in the Åland archipelago. Seeds were sown in 9 x 9 cm flower pots in a  
490 mixture of 30% sand, and 70% potting soil. Plants were maintained in the greenhouse at +20 °C  
491 until transport to the common garden location, where they were acclimated to outside conditions  
492 for at least two weeks before the start of the experiments.

493

494 Experimental parasite strains. The parasite strains used for inoculating plants in both  
495 experiments were collected from field populations in the Åland archipelago at the end of  
496 epidemics in 2014 (Table S9). We collected and purified the powdery mildew isolates as follows.  
497 Infected leaves were detached using forceps and placed into 9 cm Petri dishes containing moist  
498 filter paper. Between every sampled leaf, the forceps were sanitized with DNA-Away (Molecular  
499 Bio Products) to avoid cross-contamination. To ensure that each parasite isolate was a single  
500 strain (multi-locus genotype, MLG), we purified the isolates through three successive single-  
501 colony transfers of spores onto detached, greenhouse-grown leaves (Nicot *et al.* 2002).

502 Inoculated leaves were maintained on moist filter paper in Petri dishes in a growth chamber  
503 under standard conditions of 21°C ( $\pm 2$  °C) and 16L:8D photoperiod. We then amplified the  
504 fungal isolates through 2-3 rounds of inoculations to generate enough spores for the experiments  
505 described below.

506

507 Manipulated epidemic experiment. We performed the manipulated epidemic experiment  
508 to test how inoculating a single leaf of the rosette with a single parasite strain (“priming”)  
509 affected susceptibility of the plant to later-arriving parasite strains. The common garden  
510 experiment was performed in a 30 x 45 m fenced field at the University of Helsinki’s Lammi  
511 Biological Station (Lammi, Finland). The experiment consisted of a total of 320 plants placed in  
512 groups of eight in plastic trays (0.5 x 0.3 m), with two plants from each of the four maternal plant  
513 lines in each of 40 trays. Trays were equally spaced apart in the field along a 5 m x 5 m grid.  
514 Each plant included two leaves from the same rosette spiral enclosed in separate sleeves made  
515 from spore-proof polyester material (pollination bags from PBS International) and secured at the  
516 leaf base, which were used for a separate study and are not discussed further. One plant from  
517 each maternal line in the tray was assigned to the “primed” treatment, and the other plants were  
518 assigned to the mock-inoculated “control” treatment. On 26 July 2015, primed plants were  
519 enclosed in a plastic bag with a single leaf emerging through a small hole in the bag. A fine  
520 paintbrush was used to inoculate that leaf with one of the four priming strains, depending on the  
521 tray ID. Twenty-four hours after inoculation, the leaf was covered with a spore-proof sleeve, the  
522 plastic bag was wiped with ethanol and removed. Control plants underwent the same procedure,  
523 but no powdery mildew was inoculated.

524 The plants in the common garden were then bulk-exposed to all four powdery mildew  
525 strains over the course of four days (30 July-2 August; days 4 to 8 post-priming). This was done  
526 by rotating heavily infected source plants next to the trays, such that each tray was exposed to  
527 each of the strains for 24 hours.

528 The plants in the common garden were screened for infection between 19-23 August. We  
529 recorded the total number of uninfected and infected leaves for each plant. We collected several  
530 infected leaves from each plant for genotyping. These infected leaves were stored in paper  
531 envelopes at room temperature until DNA extraction (see Genetic analyses section below).

532

533 Natural epidemic experiment. This experiment tested whether the sequence and timing of  
534 priming influenced subsequent infection among sentinel plants placed into three field  
535 populations during natural epidemics. We used the same set of four host plant maternal lines as  
536 in the common garden experiment, and plants in the priming treatment were inoculated with a  
537 parasite strain that had been present in the field population the previous year (Table S8). Priming  
538 of a single leaf was performed as in the common garden experiment. To manipulate infection  
539 timing, plants were primed either 8 days (treatment P1) or 4 days (treatment P2) prior to being  
540 placed into the three field populations on 4 August 2015. There were also C1 and C2 control  
541 plants set up at the same time (but mock inoculated). For each of the four host plant maternal  
542 lines in each of the three field populations, we had 10 replicates of P1, 10 replicates of P2, 5  
543 replicates of C1, and 5 replicates of C2, for a total of 360 plants. Groups of paired primed and  
544 control sentinel plants were placed on plastic trays throughout the field populations. The trays  
545 were watered and moved to new locations every two days for 8 days, to standardize exposure to  
546 powdery mildew spores. After the 8 days of exposure to natural epidemics, the plants were

547 covered individual spore-proof pollination bags and transported back to the Lammi Biological  
548 Station, where infections were allowed to continue developing for another 10 days. Then we  
549 counted infected and uninfected leaves in each size class as described for the common garden  
550 experiment. We also saved infected leaves in individual paper envelopes to genotype and  
551 determine which strains infected them.

552         While the sentinels were in the field populations, we surveyed wild plants from each  
553 population for infection and tagged infected plants located at least 1.5 m apart. Up to 44 infected  
554 plants per population were tagged. At the end of the epidemics, we collected samples of infected  
555 leaves from the tagged plants for genotyping and parasite strain identification. Infected leaves  
556 were stored in paper envelopes at room temperature until prepared as samples.

557  
558         Wild host survey. The wild host survey was carried out in the Åland archipelago in 2014  
559 and consisted of fifteen host populations that had been infected for at least three consecutive  
560 years (Jousimo *et al.* 2014). Distances between pairs of populations ranged from ~ 1 km to ~ 40  
561 km. Each population was surveyed biweekly for infection starting on 7 July, 2014, by visually  
562 scanning plants for signs of the mildew. When host individuals became infected, the date of  
563 infection was recorded and those hosts were physically tagged in order to be resurveyed as focal  
564 hosts. Up to thirty focal hosts were tagged in each population. Focal plants were located at least  
565 3 m from one another and their locations were recorded by GPS. To minimize the impact of  
566 sampling on pathogen community assembly, we sampled lesions from focal hosts and genotyped  
567 the infections only after more than one leaf of a focal host was infected. We sampled lesions in  
568 such a manner that spores also remained on the plants, thus the infection was not removed from  
569 the epidemic. All hosts that survived were then resampled at the end of the season (n = 105 hosts

570 across 13 populations). Sampling consisted of placing infected leaves in paper envelopes, which  
571 were stored in a cool, dry place until the end of the field season, at which point the samples were  
572 taken to Helsinki and stored at -20C. These two genotyping sessions were used to infer the  
573 sequence of infection on host individuals, while the frequent surveys of whole host populations  
574 were used to infer phenology of the parasite strains.

575

576 Genetic analyses. We genotyped infections in all three studies to determine which  
577 powdery mildew strains successfully established on the host plants. Each sample consisted of a  
578 lesion from an infected leaf, which we placed into a 1.5 mL tube that was stored at -20°C until  
579 DNA was extracted using an E.Z.N.A. Plant Mini Kit (Omega Bio-Tek, Norcross, GA) at the  
580 Institute of Biotechnology, University of Helsinki. The lesions consisted of both host tissue and  
581 fungal material. Samples were genotyped at 19 single nucleotide polymorphism (SNP) loci with  
582 the Sequenom iPlex platform at the Institute for Molecular Medicine Finland (See Tollenaere *et*  
583 *al.* 2012; Parratt *et al.* 2017 for details). Because *Po. plantaginis* conidial spores are haploid,  
584 samples were classified as coinfecting if two different nucleotides were called at any locus  
585 (Tollenaere *et al.* 2012). The observed coinfections were resolved into single infections with an  
586 algorithm that compared each coinfection profile to the genotypes of all single infections in the  
587 experiment (i.e., to the four strains in the manipulated epidemic experiment or to all single  
588 infections from the same population in the natural epidemic experiment). When a match was  
589 found, the genotype of the other coinfecting strain could be determined as having the  
590 complementary alleles at the heterozygous loci. However, for samples with only a few  
591 heterozygous loci and where multiple strains had the same nucleotides at those loci, we could  
592 only unambiguously identify one of the two coinfecting strains. For samples from the

593 manipulated epidemic experiment that failed to call all 19 SNPs, we were still able to identify the  
594 strain if the nucleotides at the successfully called SNPs were unique to one of the four strains in  
595 that experiment. However, samples from the natural epidemic experiment or wild host surveys  
596 that were missing genotype data from any of the 19 SNPs were excluded from the analysis.

597 From sentinel plants in the manipulated epidemic and natural epidemic experiments, we  
598 randomly selected four infected leaves per plant for genotyping (if fewer than four leaves on the  
599 plant were infected, then all infected leaves were sampled). In addition, we genotyped infections  
600 from a subset of the primed leaves to verify that plants were primed with the correct parasite  
601 strains. A large number of samples failed to call several of the 19 SNP loci during our first round  
602 of genotyping in spring 2016. To replace those samples for which genotyping failed, we  
603 extracted DNA from remaining infected leaves from the same plants and genotyped those  
604 replacement samples in spring 2017.

605

## 606 *Analysis*

607 All analyses were conducted in R version 3.5.2 (R Core Team 2015). We omitted plants  
608 from analyses that were inoculated, but never became infected or that were mock-inoculated but  
609 became infected (85 in the manipulated epidemic experiment; 165 in the natural epidemic  
610 experiment), as well as plants that died prior to data collection (4 in the manipulated epidemic  
611 experiment; 2 in the natural epidemic experiment) resulting in a total sample size of  $n = 231$  in  
612 the manipulated epidemic experiment and  $n = 193$  in the natural epidemic experiment.

613 Manipulated epidemic experiment. We first tested whether the priming treatment altered  
614 infection during the manipulated epidemic by constructing three models using the R package  
615 lme4 (Bates *et al.* 2014): (1) the probability of a plant becoming infected, using a logistic mixed



616 model, (2) the logit-transformed proportion of leaves infected as a response measure representing  
617 infection severity, using a linear mixed model, and (3) the logit-transformed proportion of leaves  
618 infected as a response measure representing infection severity, limited to infected hosts only,  
619 using a linear mixed model. All three models included the experimental treatment (inoculated  
620 vs. mock inoculated) as a fixed effect. We included the log-transformed number of leaves as a  
621 fixed covariate in the model, because plants with more leaves have a higher probability of  
622 intercepting infectious spores. Inoculation tray was included as a random effect in the model. To  
623 test whether treatment effects differed among host genotypes and priming strains, we fit three  
624 models with the same three response variables, this time including the full priming treatment  
625 (five levels: mock-inoculated, and four priming strains), plant genotype, and their interactions as  
626 fixed effects, the log-transformed total number of leaves as a fixed covariate, and priming tray as  
627 a random effect. We evaluated differences among various model coefficients using the emmeans  
628 package in R (Lenth *et al.* 2018).

629         To test whether the priming strain facilitated other later arriving strains at least as  
630 strongly as it facilitated itself, we fit a model with a binomial response representing whether or  
631 not the host became infected, and including the priming treatment as a binary factor (control vs  
632 primed) and its interaction with whether or not the infecting strain was different from the  
633 priming strain. The model also included log-transformed total number of leaves as a fixed  
634 covariate and the tray and plant id as nested random intercepts. Finally, we tested whether  
635 within-host priority effects altered the structure of parasite assemblages, using a multivariate  
636 generalized linear model using the MVabun package in R (Wang *et al.* 2012). To measure the  
637 effect of prior infection on the structure parasite assemblages, we constructed a model that tests  
638 whether the distribution of infection by each strain was affected by the priming treatment (five

639 levels: control, and four priming genotypes), plant genotype, and their interactions, including the  
640 log-transformed total number of leaves as a covariate. These models avoid some of the problems  
641 associated with distance-based models such as permANOVA. However, because these models  
642 cannot handle unbalanced grouping variables, experimental tray was included as a covariate  
643 rather than a random effect in the model.

644 Natural epidemic experiment. We first tested whether the priming treatment altered  
645 infection during the natural epidemic by constructing three models using the lme4 package in R:  
646 (1) the probability of a plant becoming infected, using a logistic mixed model, (2) the logit-  
647 transformed proportion of leaves infected as a response measure representing infection severity,  
648 using a linear mixed model, and (3) the logit-transformed proportion of leaves infected as a  
649 response measure representing infection severity, limited to infected hosts only, using a linear  
650 mixed model. Each model included host population, plant genotype, and the experimental  
651 treatment (C1: control for the first priming treatment, C2: control for the second priming  
652 treatment, P1: first priming treatment at eight days prior to placement in the field, and P2: second  
653 priming treatment at four days prior to placement in the field) as interactive fixed effects and the  
654 log-transformed total number of leaves as a fixed covariate. Experimental tray was included as a  
655 random intercept in the model, but this random effect did not explain any of the variance in some  
656 of the models, leading to a computational singularity. Despite the computational singularity, we  
657 opted to keep experimental tray in all models to account for non-independence among samples in  
658 each patch. In the logistic regression model, there were no significant interactions ( $p = 1$ ), and  
659 owing to the binary response variable and high number of predictors, the model suffered from  
660 complete separation. We therefore iteratively removed all non-significant interactions, yielding a

661 reduced model. We evaluated differences among various model coefficients in the reduced  
662 models using the emmeans package.

663 We tested whether priority effects among parasite strains could lead to variation in the  
664 structure of parasite assemblages among hosts during a natural epidemic with a multivariate  
665 generalised linear model using the MVabun package in R, to test whether the distribution of  
666 infection by each strain was affected by the priming treatment (four levels: C1, C2, P1, and 2),  
667 patch, plant genotype, and their interactions, including the total number of leaves as a covariate.  
668 To fit this model, we removed from the dataset any plant that had an infection that could not be  
669 genotyped, resulting in a total of 181 plants for this analysis. Similar to previous analyses, we  
670 reduced the model by removing non-significant interactions.

671 Wild host survey. To test whether parasite strains exhibit priority effects within hosts, we  
672 first fit a series of cox proportional hazards models following Halliday et al (2017, 2018) using  
673 the coxphf package in R (Ploner & Heinze 2015). To fit these models, we made one critical  
674 assumption about the data: we assumed that whichever strain was first observed in genotyping  
675 was the “early arriving strain”. This assumption allows us to use temporal data from the first  
676 observations of a host, regardless of the time between that survey and the genotyping date.  
677 However, this assumption ignores the possibility of rare parasite strains being locally cleared  
678 early during the epidemic. Furthermore, because we could not resolve the sequence of infection  
679 on host individuals that are coinfecting during the initial genotyping survey (occurring in 22/105  
680 host individuals), both coinfecting parasites were assumed to have been present at the initial  
681 infection of the host. We then fit a series of cox proportional hazards models of infection by each  
682 parasite as a focal (i.e., late-arriving) parasite with prior infection by each other (i.e., early-  
683 arriving) parasite as the only predictor in each model. These models tested whether the time until

684 infection by each strain was influenced by infection sequence on a host individual. Across the  
685 Åland archipelago, distinct host populations often harbor distinct parasite assemblages. Parasite  
686 strains were therefore only modeled among hosts that occurred in populations where those  
687 Parasites had been observed. To explore whether the magnitude of priority effects among  
688 parasite strains tended to be facilitative or antagonistic, we next fit an intercept only linear mixed  
689 model with the coefficient from the cox proportional hazards models (i.e., the interaction  
690 coefficient) as the response variable and the identity of the focal (i.e., late arriving) parasite in  
691 the cox proportional hazards models as a random intercept, weighting the regression by the  
692 number of surveys per host individual to give more explanatory power to host individuals that  
693 were surveyed more times over the growing season. Finally, we tested whether parasite  
694 phenology among strains altered the structure of parasite assemblages within hosts using a  
695 multivariate generalised linear model on the distribution of infections by each strain at the end of  
696 the epidemic, in the R package MVabund. To measure parasite phenology, we recorded the  
697 earliest date that each strain was observed in the field during the 2014 epidemic. We then  
698 modeled the presence or absence of each strain at the end of the season as a function of the  
699 phenology of the early-infecting strains, with the sampling date of the final survey and host  
700 population as covariates in the model.

701

702

703 **References**

- 704 Bates, D., Mächler, M., Bolker, B. & Walker, S. (2014). Fitting Linear Mixed-Effects Models using  
705 lme4. *J. Stat. Softw.*, 67, 1–48.
- 706 Bhattacharya, A., Toro Díaz, V.C., Morran, L.T. & Bashey, F. (2019). Evolution of increased  
707 virulence is associated with decreased spite in the insect-pathogenic bacterium  
708 *Xenorhabdus nematophila*. *Biol. Lett.*, 15, 20190432.
- 709 Biere, A. & Goverse, A. (2016). Plant-Mediated Systemic Interactions Between Pathogens,  
710 Parasitic Nematodes, and Herbivores Above-and Belowground. *Annu. Rev. Phytopathol.*,  
711 54, 499–527.
- 712 Bolnick, D.I., Amarasekare, P., Araújo, M.S., Bürger, R., Levine, J.M., Novak, M., *et al.* (2011).  
713 Why intraspecific trait variation matters in community ecology. *Trends Ecol. Evol.*, 26, 183–  
714 92.
- 715 Borer, E.T., Laine, A.-L. & Seabloom, E.W. (2016). A multiscale approach to plant disease using  
716 the metacommunity concept. *Annu. Rev. Phytopathol.*, 54, 397–418.
- 717 Budischak, S.A., Sakamoto, K., Megow, L.C., Cummings, K.R., Urban, J.F. & Ezenwa, V.O. (2015).  
718 Resource limitation alters the consequences of co-infection for both hosts and parasites.  
719 *Int. J. Parasitol.*, 45, 455–463.
- 720 Budischak, S.A., Wiria, A.E., Hamid, F., Wammes, L.J., Kaiser, M.M.M., van Lieshout, L., *et al.*  
721 (2018). Competing for blood: the ecology of parasite resource competition in human  
722 malaria–helminth co-infections. *Ecol. Lett.*, 21, 536–545.
- 723 Burdon, J.J. & Laine, A.-L. (2019). *Evolutionary dynamics of plant pathogen interactions*.  
724 Cambridge University Press.

725 Bushnell, W.R. (2002). The role of powdery mildew research in understanding host-parasite  
726 interactions. In: *The powdery mildews: a comprehensive treatise* (eds. Belanger, R.R.,  
727 Bushnell, W.R., Dik, A.J. & Carver, T.L.W.). APS Press, St. Paul, Minnesota, USA, pp. 1–12.

728 Chung, E., Petit, E., Antonovics, J., Pedersen, A.B. & Hood, M.E. (2012). Variation in resistance to  
729 multiple pathogen species: anther smuts of *Silene uniflora*. *Ecol. Evol.*, 2, 2304–14.

730 Clay, P.A., Cortez, M.H., Duffy, M.A. & Rudolf, V.H.W. (2019). Priority effects within coinfecting  
731 hosts can drive unexpected population-scale patterns of parasite prevalence. *Oikos*, 128,  
732 571–583.

733 Clay, P.A., Duffy, M.A. & Rudolf, V.H.W. (2020). Within-host priority effects and epidemic timing  
734 determine outbreak severity in co-infected populations. *Proc. R. Soc. B Biol. Sci.*, 287,  
735 20200046.

736 Cobey, S. & Lipsitch, M. (2013). Pathogen diversity and hidden regimes of apparent  
737 competition. *Am. Nat.*, 181, 12–24.

738 Conrath, U., Beckers, G.J.M., Flors, V., García-Agustín, P., Jakab, G., Mauch, F., *et al.* (2006).  
739 Priming: Getting Ready for Battle. *Mol. Plant-Microbe Interact.*, 19, 1062–1071.

740 Conrath, U., Beckers, G.J.M., Langenbach, C.J.G. & Jaskiewicz, M.R. (2015). Priming for  
741 Enhanced Defense. *Annu. Rev. Phytopathol.*, 53, 97–119.

742 Dobson, A., Lafferty, K.D., Kuris, A.M., Hechinger, R.F. & Jetz, W. (2008). Homage to Linnaeus:  
743 How many parasites? How many hosts? *Proc. Natl. Acad. Sci.*, 105, 11482–11489.

744 Douma, J.C., Vermeulen, P.J., Poelman, E.H., Dicke, M. & Anten, N.P.R. (2017). When does it pay  
745 off to prime for defense? A modeling analysis. *New Phytol.*, 216, 782–797.

746 Eswarappa, S.M., Estrela, S. & Brown, S.P. (2012). Within-host dynamics of multi-species

747 infections: Facilitation, competition and virulence. *PLoS One*.

748 Ezenwa, V.O. (2016). Helminth–microparasite co-infection in wildlife: lessons from ruminants,  
749 rodents and rabbits. *Parasite Immunol.*, 38, 527–534.

750 Ezenwa, V.O., Etienne, R.S., Luikart, G., Beja-Pereira, A. & Jolles, A.E. (2010). Hidden  
751 consequences of living in a wormy world: nematode-induced immune suppression  
752 facilitates tuberculosis invasion in African buffalo. *Am. Nat.*, 176, 613–24.

753 Ferro, K., Peuß, R., Yang, W., Rosenstiel, P., Schulenburg, H. & Kurtz, J. (2019). Experimental  
754 evolution of immunological specificity. *Proc. Natl. Acad. Sci. U. S. A.*, 116, 20598–20604.

755 Fukami, T. (2015). Historical contingency in community assembly : integrating niches, species  
756 pools, and priority effects. *Annu. Rev. Ecol. Evol. Syst.*, 46, 1–23.

757 Fukami, T., Mordecai, E.A. & Ostling, A. (2016). A framework for priority effects. *J. Veg. Sci.*, 27,  
758 655–657.

759 Fulton, R.W. (1986). Practices and Precautions in the Use of Cross Protection for Plant Virus  
760 Disease Control. *Annu. Rev. Phytopathol.*, 24, 67–81.

761 Glazebrook, J. (2005). Contrasting Mechanisms of Defense Against Biotrophic and Necrotrophic  
762 Pathogens. *Annu. Rev. Phytopathol.*, 43, 205–227.

763 Graham, A.L. (2008). Ecological rules governing helminth microparasite coinfection. *Proc. Natl.*  
764 *Acad. Sci.*, 105, 566–570.

765 Greischar, M.A., Alexander, H.K., Bashey, F., Bento, A.I., Bhattacharya, A., Bushman, M., *et al.*  
766 (2020). Evolutionary consequences of feedbacks between within-host competition and  
767 disease control. *Evol. Med. Public Heal.*, 2020, 30–34.

768 Greischar, M.A. & Koskella, B. (2007). A synthesis of experimental work on parasite local

769 adaptation. *Ecol. Lett.*, 10, 418–434.

770 Griffiths, E.C., Pedersen, A.B., Fenton, A. & Petchey, O.L. (2014). Analysis of a summary network  
771 of co-infection in humans reveals that parasites interact most via shared resources. *Proc.*  
772 *R. Soc. B Biol. Sci.*, 281, 20132286–20132286.

773 Halliday, F.W., Umbanhowar, J. & Mitchell, C.E. (2017). Interactions among symbionts operate  
774 across scales to influence parasite epidemics. *Ecol. Lett.*, 20, 1285–1294.

775 Halliday, F.W., Umbanhowar, J. & Mitchell, C.E. (2018). A host immune hormone modifies  
776 parasite species interactions and epidemics: insights from a field manipulation. *Proc. R.*  
777 *Soc. B Biol. Sci.*, 285, 20182075.

778 Hawley, D.M. & Altizer, S.M. (2011). Disease ecology meets ecological immunology:  
779 understanding the links between organismal immunity and infection dynamics in natural  
780 populations. *Funct. Ecol.*, 25, 48–60.

781 Hellard, E., Fouchet, D., Vavre, F. & Pontier, D. (2015). Parasite-Parasite Interactions in the Wild:  
782 How To Detect Them? *Trends Parasitol.*

783 Hoeksema, J.D. & Forde, S.E. (2008). A meta-analysis of factors affecting local adaptation  
784 between interacting species. *Am. Nat.*, 171, 275–290.

785 Hoverman, J.T., Hoyer, B.J. & Johnson, P.T.J. (2013). Does timing matter? How priority effects  
786 influence the outcome of parasite interactions within hosts. *Oecologia*, 173, 1471–1480.

787 Jenner, E. (1923). *An Inquiry into the Causes and Effects of the Variolae Vaccinae, a Disease*  
788 *Discovered in Some of the Western Countries of England, Particularly Gloucestershire, and*  
789 *Known by the Name of "The Cow Pox" (1798). Repr. by Milan R Lier Co. Milan, R. Lier & Co.,*  
790 London.



791 Johnson, P.T.J., de Roode, J.C. & Fenton, A. (2015). Why infectious disease research needs  
792 community ecology. *Science (80-. )*, 349, 1259504.

793 Jousimo, J., Tack, A. & Ovaskainen, O. (2014). Ecological and evolutionary effects of  
794 fragmentation on infectious disease dynamics. *Science (80-. )*, 15153.

795 Karvonen, A., Jokela, J. & Laine, A.-L. (2019). Importance of Sequence and Timing in Parasite  
796 Coinfections. *Trends Parasitol.*, 35, 109–118.

797 Kliebenstein, D.J. & Rowe, H.C. (2008). Ecological costs of biotrophic versus necrotrophic  
798 pathogen resistance, the hypersensitive response and signal transduction. *Plant Sci.*, 174,  
799 551–556.

800 Koornneef, A., Leon-Reyes, A., Ritsema, T., Verhage, A., Den Otter, F.C., Van Loon, L.C., *et al.*  
801 (2008). Kinetics of Salicylate-Mediated Suppression of Jasmonate Signaling Reveal a Role  
802 for Redox Modulation. *Plant Physiol.*, 147, 1358–1368.

803 Kuris, A.M., Blaustein, A.R. & Alio, J.J. (1980). Hosts as Islands. *Am. Nat.*, 116, 570–586.

804 Laine, A.L. (2004). Resistance variation within and among host populations in a plant-pathogen  
805 metapopulation: Implications for regional pathogen dynamics. *J. Ecol.*

806 Laine, A.L. (2007). Pathogen fitness components and genotypes differ in their sensitivity to  
807 nutrient and temperature variation in a wild plant-pathogen association. *J. Evol. Biol.*, 20,  
808 2371–2378.

809 Laine, A.L. (2011). Context-dependent effects of induced resistance under co-infection in a  
810 plant-pathogen interaction. *Evol. Appl.*, 4, 696–707.

811 Laine, A.L. & Hanski, I. (2006). Large-scale spatial dynamics of a specialist plant pathogen in a  
812 fragmented landscape. *J. Ecol.*, 94, 217–226.

813 Lambrechts, L., Fellous, S. & Koella, J.C. (2006). Coevolutionary interactions between host and  
814 parasite genotypes. *Trends Parasitol.*, 22, 12–16.

815 Laughlin, D.C., Joshi, C., van Bodegom, P.M., Bastow, Z. a, Fulé, P.Z. & Fukami, T. (2012). A  
816 predictive model of community assembly that incorporates intraspecific trait variation.  
817 *Ecol. Lett.*, 15, 1291–9.

818 Lello, J., Boag, B., Fenton, A., Stevenson, I.R. & Hudson, P.J. (2004). Competition and mutualism  
819 among the gut helminths of a mammalian host. *Nature*, 428, 840–844.

820 Lenth, R., Singmann, H., Love, J. & others. (2018). Emmeans: Estimated marginal means, aka  
821 least-squares means. *R Packag. version*, 1.

822 Leung, J.M., Budischak, S.A., Chung The, H., Hansen, C., Bowcutt, R., Neill, R., *et al.* (2018). Rapid  
823 environmental effects on gut nematode susceptibility in rewilded mice. *PLOS Biol.*, 16,  
824 e2004108.

825 Lloyd-Smith, J.O., Schreiber, S.J., Kopp, P.E. & Getz, W.M. (2005). Superspreading and the effect  
826 of individual variation on disease emergence. *Nature*, 438, 355–359.

827 Van Loon, L.C. (1997). Induced resistance in plants and the role of pathogenesis-related  
828 proteins. *Eur. J. Plant Pathol.*, 103, 753–765.

829 Mauch-Mani, B., Baccelli, I., Luna, E. & Flors, V. (2017). Defense Priming: An Adaptive Part of  
830 Induced Resistance. *Annu. Rev. Plant Biol.*, 68, 485–512.

831 Mideo, N. (2009). Parasite adaptations to within-host competition. *Trends Parasitol.*, 25, 261–8.

832 Mideo, N., Alizon, S. & Day, T. (2008). Linking within- and between-host dynamics in the  
833 evolutionary epidemiology of infectious diseases. *Trends Ecol. & Evol.*, 23, 511–517.

834 Mordecai, E.A., Gross, K. & Mitchell, C.E. (2016). Within-Host Niche Differences and Fitness

835 Trade-offs Promote Coexistence of Plant Viruses. *Am. Nat.*, 187, E13–E26.

836 Nicot, P.C., Bardin, M. & Dik, A.J. (2002). Basic methods for epidemiological studies of powdery  
837 mildews: culture and preservation of isolates, production and delivery of inoculum, and  
838 disease assessment. In: *The powdery mildews: a comprehensive treatise* (eds. Belanger,  
839 R.R., Bushnell, W.R., Dik, A.J. & Carver, T.L.W.). APS Press, St. Paul, Minnesota, USA, pp.  
840 83–99.

841 Ojanen, S.P., Nieminen, M., Meyke, E., Pöyry, J. & Hanski, I. (2013). Long-term metapopulation  
842 study of the Glanville fritillary butterfly (*Melitaea cinxia*): Survey methods, data  
843 management, and long-term population trends. *Ecol. Evol.*, 3, 3713–3737.

844 Parratt, S.R., Barrès, B., Penczykowski, R.M. & Laine, A.-L. (2017). Local adaptation at higher  
845 trophic levels: contrasting hyperparasite–pathogen infection dynamics in the field and  
846 laboratory. *Mol. Ecol.*, 26, 1964–1979.

847 Pedersen, A.B. & Fenton, A. (2015). The role of antiparasite treatment experiments in assessing  
848 the impact of parasites on wildlife. *Trends Parasitol.*, 31, 200–11.

849 Pedersen, A.B. & Greives, T.J. (2008). The interaction of parasites and resources cause crashes  
850 in a wild mouse population. *J. Anim. Ecol.*, 77, 370–7.

851 Penczykowski, R.M., Laine, A.L. & Koskella, B. (2016). Understanding the ecology and evolution  
852 of host-parasite interactions across scales. *Evol. Appl.*, 9, 37–52.

853 Penczykowski, R.M., Parratt, S.R., Barrès, B., Sallinen, S.K. & Laine, A.L. (2018). Manipulating  
854 host resistance structure reveals impact of pathogen dispersal and environmental  
855 heterogeneity on epidemics. *Ecology*, 99, 2853–2863.

856 Penczykowski, R.M., Walker, E., Soubeyrand, S. & Laine, A.-L. (2015). Linking winter conditions

857 to regional disease dynamics in a wild plant-pathogen metapopulation. *New Phytol.*, 205,  
858 1142–1152.

859 Pieterse, C.M.J., Van der Does, D., Zamioudis, C., Leon-Reyes, A. & Van Wees, S.C.M. (2012).  
860 Hormonal modulation of plant immunity. *Annu. Rev. Cell Dev. Biol.*, 28, 489–521.

861 Pieterse, C.M.J., Zamioudis, C., Berendsen, R.L., Weller, D.M., Van Wees, S.C.M. & Bakker,  
862 P.A.H.M. (2014). Induced Systemic Resistance by Beneficial Microbes. *Annu. Rev.*  
863 *Phytopathol.*, 52, 347–375.

864 Ploner, M. & Heinze, G. (2015). coxphf: Cox regression with Firth’s penalized likelihood. *R*  
865 *Found. Stat. Comput.*

866 R Core Team. (2015). R: a language and environment for statistical computing | GBIF.ORG.

867 Read, A.F. & Taylor, L.H. (2001). The ecology of genetically diverse infections. *Science*, 292,  
868 1099–102.

869 Ross, M.D. (1973). Inheritance of self-incompatibility in *Plantago lanceolata*. *Heredity (Edinb)*,  
870 30, 169–176.

871 Rynkiewicz, E.C., Fenton, A. & Pedersen, A.B. (2019). Linking community assembly and structure  
872 across scales in a wild mouse parasite community. *Ecol. Evol.*, ece3.5785.

873 Rynkiewicz, E.C., Pedersen, A.B. & Fenton, A. (2015). An ecosystem approach to understanding  
874 and managing within-host parasite community dynamics. *Trends Parasitol.*, 31, 212–221.

875 Sagar, G.R. & Harper, J.L. (1964). *Plantago major* L., *P. media* L. and *P. lanceolata*. *J. Ecol.*, 52,  
876 189–221.

877 Seabloom, E.W., Borer, E.T., Gross, K., Kendig, A.E., Lacroix, C., Mitchell, C.E., *et al.* (2015). The  
878 community ecology of pathogens: Coinfection, coexistence and community composition.

879 *Ecol. Lett.*, 18, 401–415.

880 Seabloom, E.W., Hosseini, P.R., Power, A.G. & Borer, E.T. (2009). Diversity and composition of  
881 viral communities: coinfection of barley and cereal yellow dwarf viruses in California  
882 grasslands. *Am. Nat.*, 173, E79–98.

883 Shaw, D.J. & Dobson, A.P. (1995). Patterns of macroparasite abundance and aggregation in  
884 wildlife populations: a quantitative review. *Parasitology*, 111, S111–S133.

885 Siefert, A. (2012). Incorporating intraspecific variation in tests of trait-based community  
886 assembly. *Oecologia*, 170, 767–775.

887 Sousa, W.P. (1992). Interspecific Interactions among Larval Trematode Parasites of Freshwater  
888 and Marine Snails Interspecific Interactions Among Larval Trematode Parasites of  
889 Freshwater and Marine Snails. *Am. Zool.*, 32, 583–592.

890 Spoel, S.H., Johnson, J.S. & Dong, X. (2007). Regulation of tradeoffs between plant defenses  
891 against pathogens with different lifestyles. *Proc. Natl. Acad. Sci. U. S. A.*, 104, 18842–7.

892 Susi, H., Barrès, B., Vale, P.F. & Laine, A.-L. (2015). Co-infection alters population dynamics of  
893 infectious disease. *Nat. Commun.*, 6, 5975.

894 Tack, A. & Laine, A. (2014). Ecological and evolutionary implications of spatial heterogeneity  
895 during the off-season for a wild plant pathogen. *New Phytol.*, 65, 297–308.

896 Tollenaere, C. & Laine, A.L. (2013). Investigating the production of sexual resting structures in a  
897 plant pathogen reveals unexpected self-fertility and genotype-by-environment effects. *J.*  
898 *Evol. Biol.*, 26, 1716–1726.

899 Tollenaere, C., Susi, H. & Laine, A.L. (2015). Evolutionary and Epidemiological Implications of  
900 Multiple Infection in Plants. *Trends Plant Sci.*, 21, 80–90.

901 Tollenaere, C., Susi, H., Nokso-Koivisto, J., Koskinen, P., Tack, A., Auvinen, P., *et al.* (2012). SNP  
902 Design from 454 Sequencing of *Podosphaera plantaginis* Transcriptome Reveals a  
903 Genetically Diverse Pathogen Metapopulation with High Levels of Mixed-Genotype  
904 Infection. *PLoS One*, 7, e52492.

905 Vannette, R.L. & Fukami, T. (2014). Historical contingency in species interactions: Towards  
906 niche-based predictions. *Ecol. Lett.*, 17, 115–124.

907 Wale, N., Sim, D.G., Jones, M.J., Salathe, R., Day, T. & Read, A.F. (2017). Resource limitation  
908 prevents the emergence of drug resistance by intensifying within-host competition. *Proc.*  
909 *Natl. Acad. Sci. U. S. A.*, 114, 13774–13779.

910 Wang, Y., Naumann, U., Wright, S.T. & Warton, D.I. (2012). Mvabund- an R package for model-  
911 based analysis of multivariate abundance data. *Methods Ecol. Evol.*, 3, 471–474.

912 Warton, D.I., Wright, S.T. & Wang, Y. (2012). Distance-based multivariate analyses confound  
913 location and dispersion effects. *Methods Ecol. Evol.*, 3, 89–101.

914 Westman, S.M., Kloth, K.J., Hanson, J., Ohlsson, A.B. & Albrechtsen, B.R. (2019). Defence priming  
915 in *Arabidopsis* – a Meta-Analysis. *Sci. Rep.*, 9, 13309.

916 Zélé, F., Magalhães, S., Kéfi, S. & Duncan, A.B. (2018). Ecology and evolution of facilitation  
917 among symbionts. *Nat. Commun.*, 9, 4869.

918 Zhan, J. & McDonald, B. a. (2013). Experimental measures of pathogen competition and relative  
919 fitness. *Annu. Rev. Phytopathol.*, 51, 131–53.

920
